# Supplementary material
Source: Springer Nature journal article supplement (https://www.springermedizin.de/resource/supplementary/12882_2011_252_MOESM2_ESM.pdf/9453378)
Supplement: MOESM2 [file 9453378]

## A. Hemodialysis patients

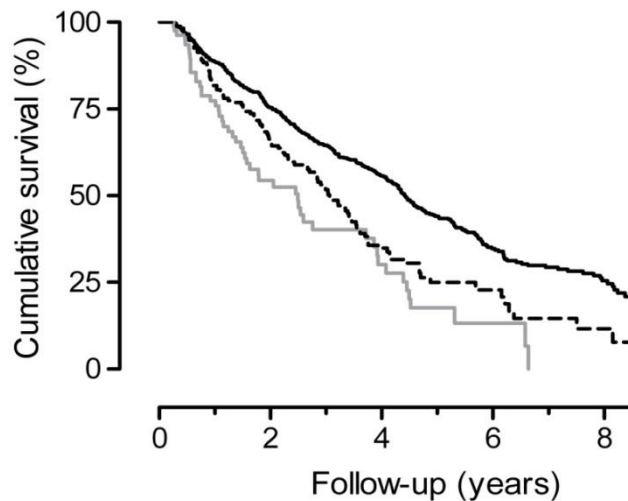

Number of patients at risk

|                     | 0   | 2   | 4   | 6  | 8  |
|---------------------|-----|-----|-----|----|----|
| <b>No DM</b>        | 910 | 489 | 227 | 72 | 24 |
| <b>DM as PRD</b>    | 179 | 91  | 29  | 9  | 2  |
| <b>DM as comorb</b> | 80  | 28  | 11  | 2  | 0  |

## B. Peritoneal dialysis patients

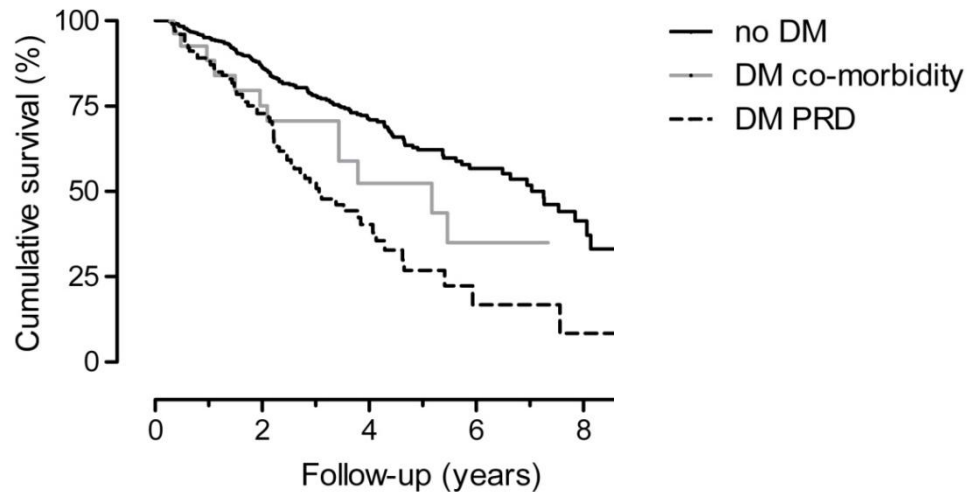

Number of patients at risk

|                     | 0   | 2   | 4   | 6  | 8 |
|---------------------|-----|-----|-----|----|---|
| <b>No DM</b>        | 555 | 303 | 144 | 42 | 6 |
| <b>DM as PRD</b>    | 102 | 51  | 13  | 3  | 1 |
| <b>DM as comorb</b> | 27  | 16  | 7   | 2  | 0 |
